# Supplementary material for: Cellular, molecular, and therapeutic characterization of pilocarpine-induced temporal lobe epilepsy
Source: PubMed Central journal article supplement (PMC8476594; doi:10.1038/s41598-021-98534-3), 2021-09-27
Supplement: 41598_2021_98534_MOESM2_ESM.pdf [file 41598_2021_98534_MOESM2_ESM.pdf]

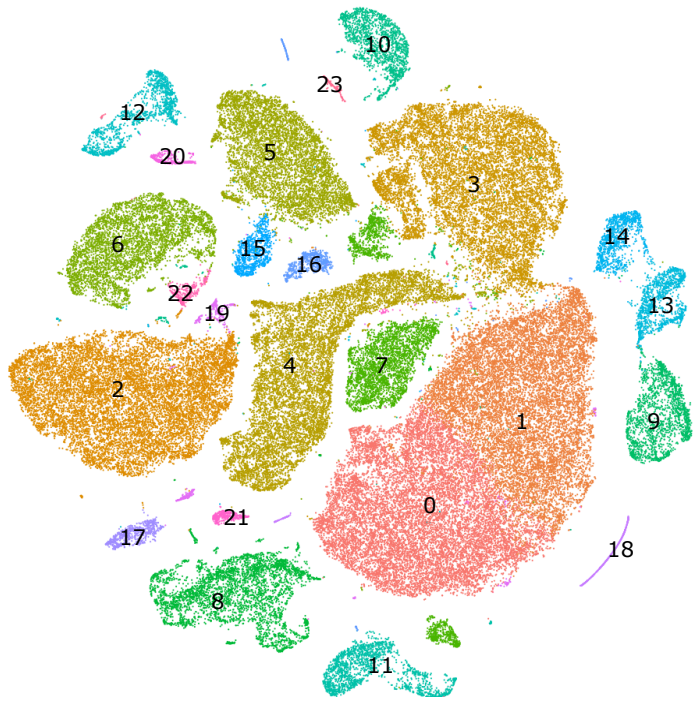

*Slc17a7* Pyramidal

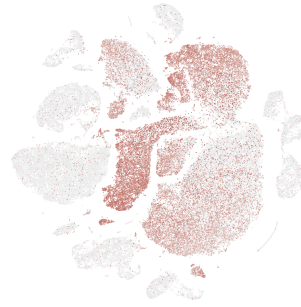

*C1ql2* Dentate neurons

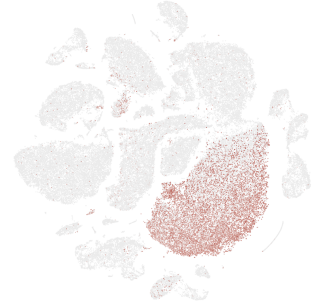

*Fibcd1* CA1|DG

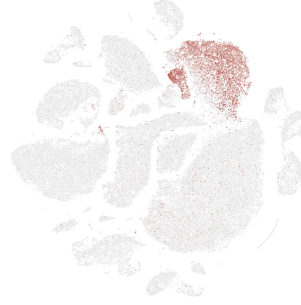

*Nxph3* Subiculum|Entorhinal

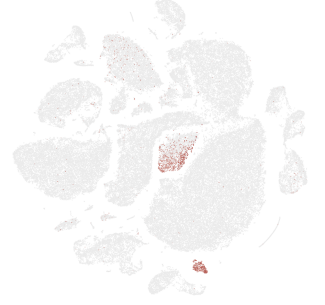

*Ptgs2* CA1

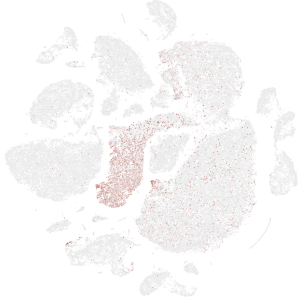

*Gad2* Interneurons

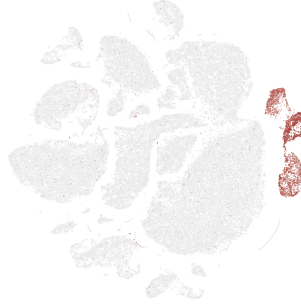

*Sst* Interneurons

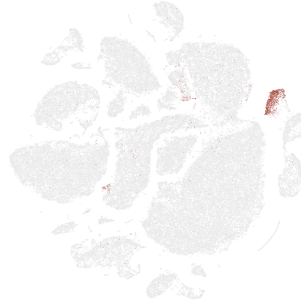

*Vip* Interneurons

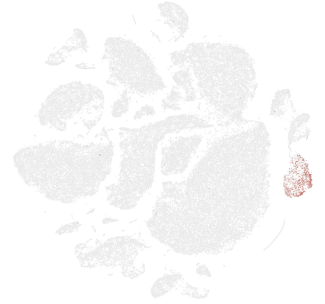

*Baiap212* Interneurons

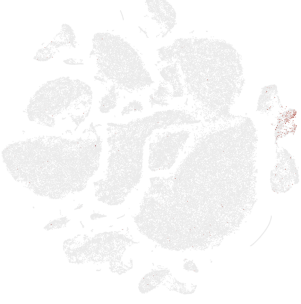

*Cldn10* Astrocytes

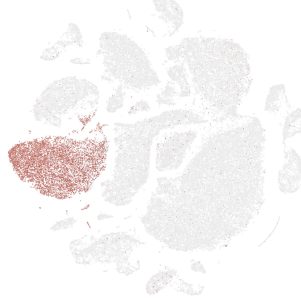

*Oplain* Oligodendrocytes

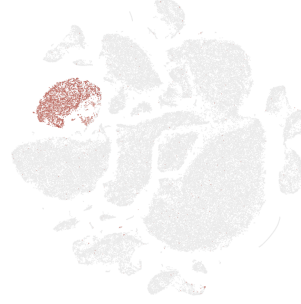

*Ctss* Microglia

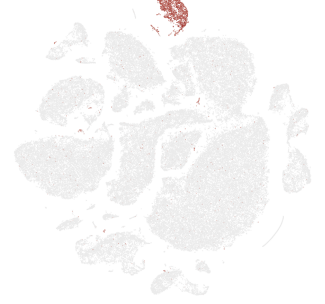

*Ly6c1* Endothelial

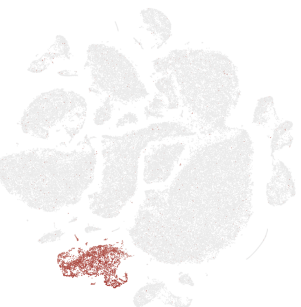

*Acta2* Mural cells

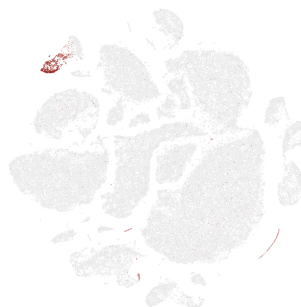

*Igfbpl1* Neurogenesis

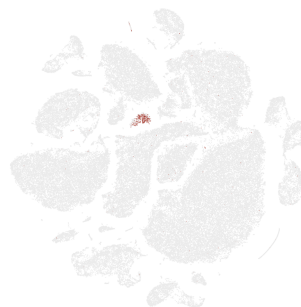

*Gpr17* Polydendrocytes

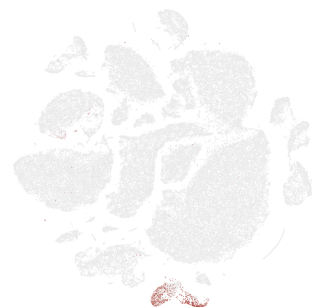

Figure S1a
