# Supplementary material for: Cellular, molecular, and therapeutic characterization of pilocarpine-induced temporal lobe epilepsy
Source: PubMed Central journal article supplement (PMC8476594; doi:10.1038/s41598-021-98534-3), 2021-09-27
Supplement: 41598_2021_98534_MOESM3_ESM.pdf [file 41598_2021_98534_MOESM3_ESM.pdf]

*Ccdc153* Ependyma

*Lhx1* Cajal Retius

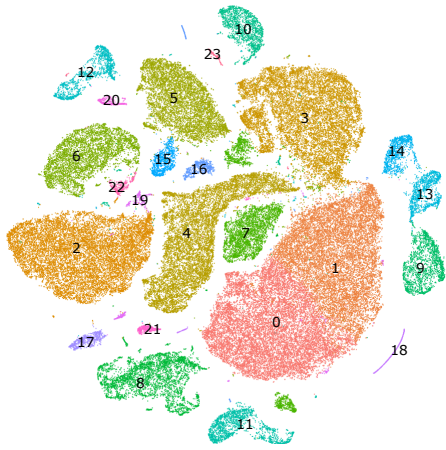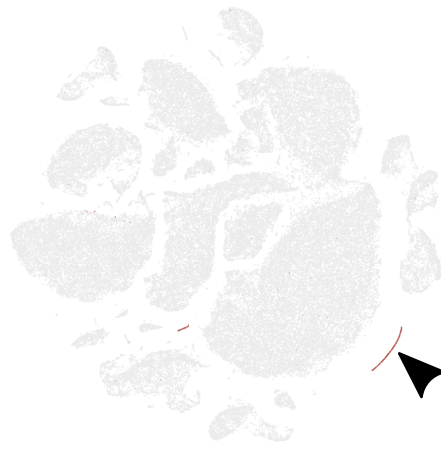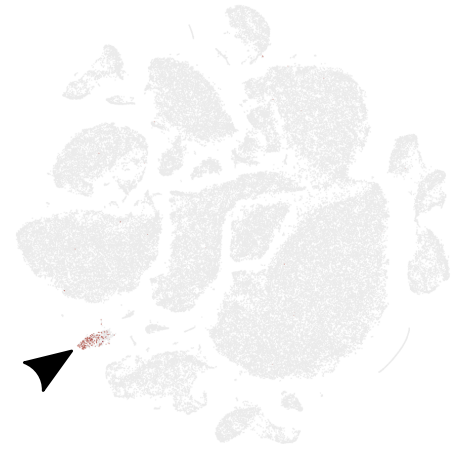

*Pvalb* Interneurons

*Asgr1* Fibroblast like

*Csf2rb2* Macrophage

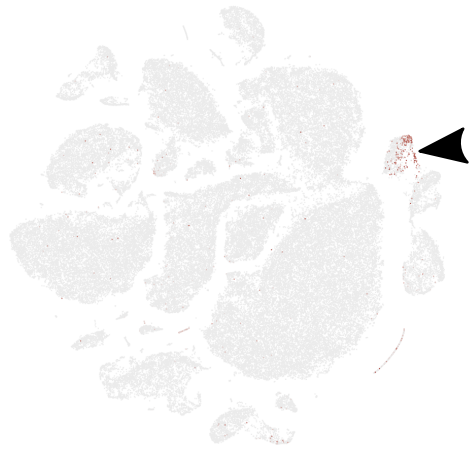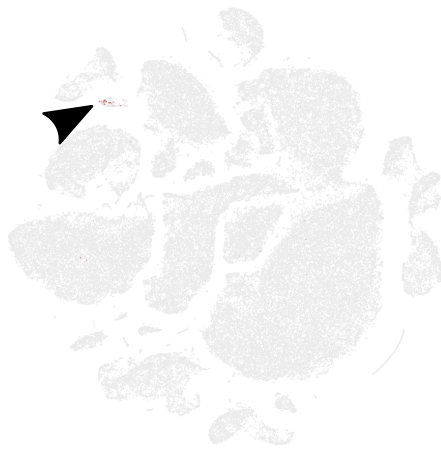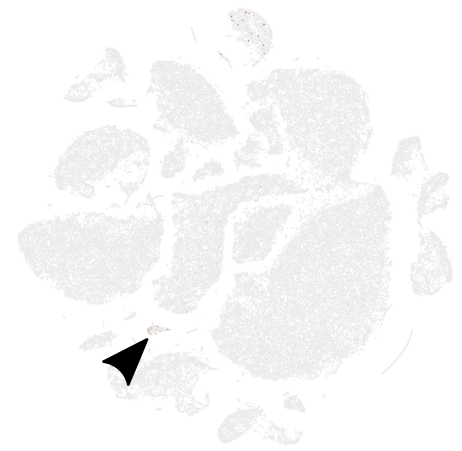

Figure S1b
