# Supplementary material for: Cellular, molecular, and therapeutic characterization of pilocarpine-induced temporal lobe epilepsy
Source: PubMed Central journal article supplement (PMC8476594; doi:10.1038/s41598-021-98534-3), 2021-09-27
Supplement: 41598_2021_98534_MOESM4_ESM.pdf [file 41598_2021_98534_MOESM4_ESM.pdf]

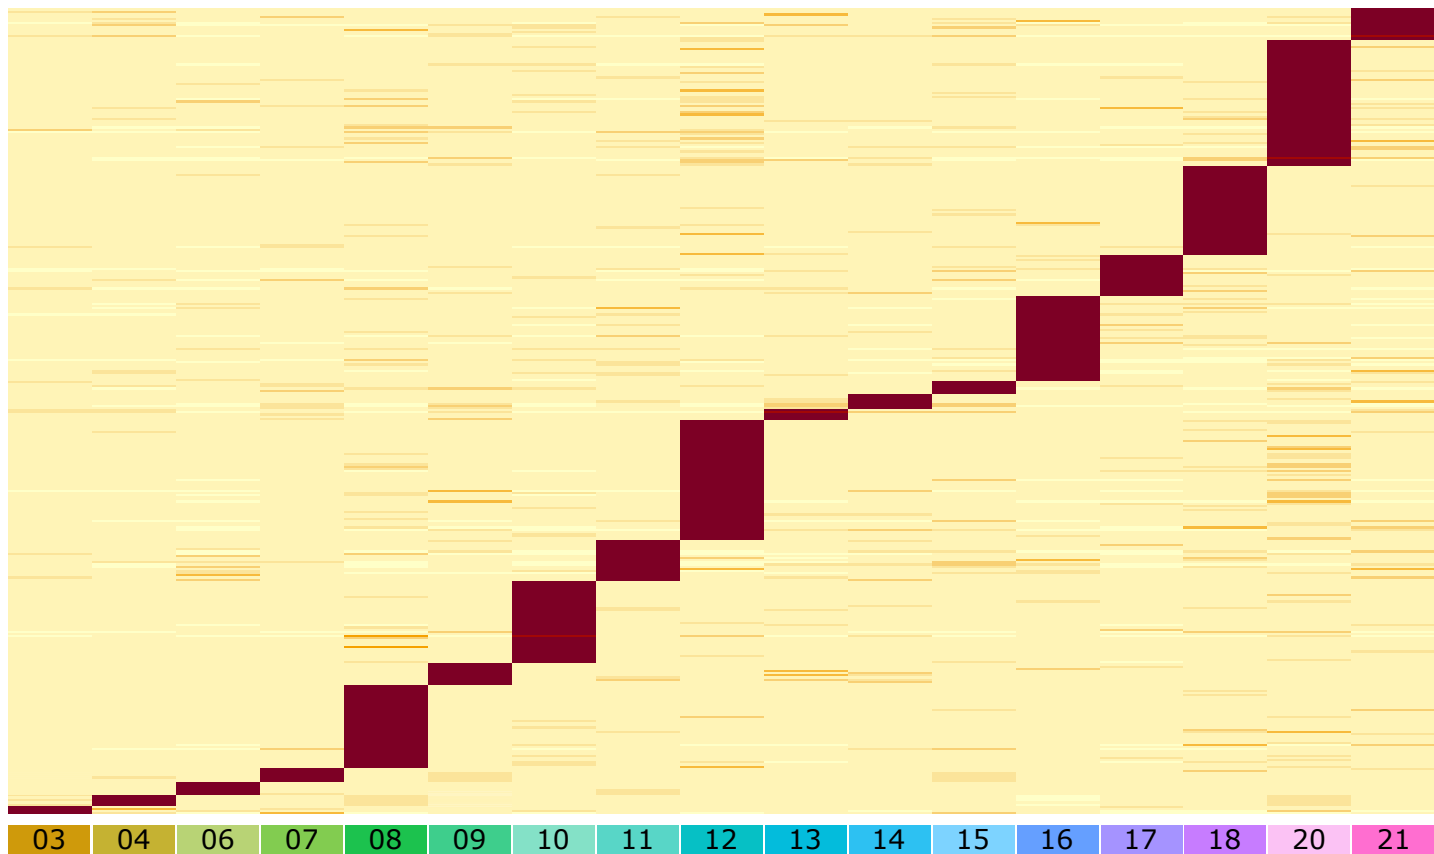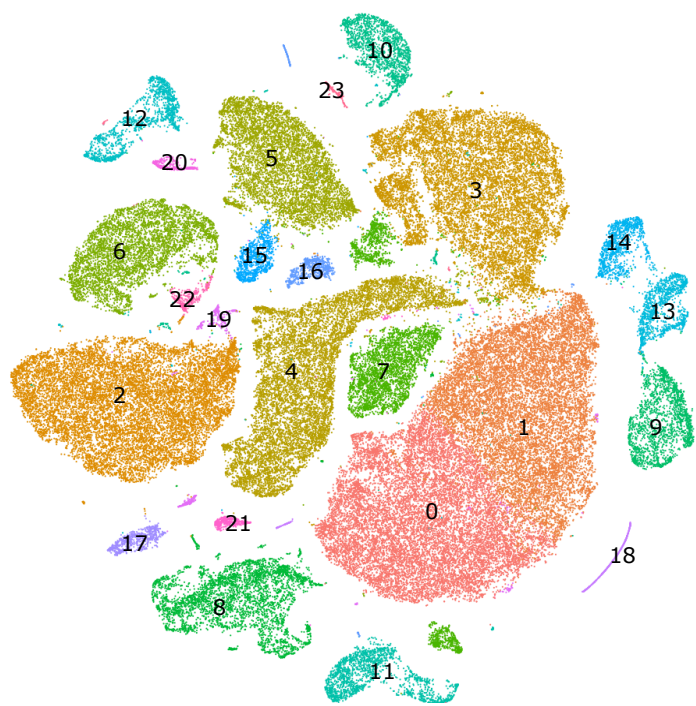

Figure S2
